# Supplementary material for: An Improved Design of the MultiCal on-site Calibration Device for Industrial Robots
Source: Preprints.org preprint supplement (doi:10.20944/preprints202305.1409.v1), 2023-05-19
Supplement: Supplementary file 2 [file supplementary]

Archive with 1 entries (1 files):
- suppl(2).pdf
